# Supplementary material for: A molecular classification of human mesenchymal stromal cells
Source: PeerJ. 2016 Mar 24;4:e1845. doi: 10.7717/peerj.1845 (PMC4811172; doi:10.7717/peerj.1845)
Supplement: Supplemental Information 2 — Table S2. (auxiliary spreadsheet). Datasets in the training set; accompanies Figure 2 and methods. [file peerj-04-1845-s002.xlsx]

## Sheet: Training set
ID	Cite	Database accession	#MSC	MSC phenotype	#non-MSC	Cell origin	Platform
Total	41 Experiments		125 MSC		510 non-MSC		10 different platforms
6345	(Walenda et al., 2013)	GSE46019	24	CD14-, CD29+, CD31-, CD34-, CD45-, CD73+, CD90+, CD105+, and CD325-;	0	Adult Bone marrow MSC, early (P3-5) and late (p10) passage.	Affymetrix HuGene-1_0-ST V1
				Adipogenic, chondrogenic and osteogenic differentiation.
				No phenotype change in presence or absence of 1ng/mL TGF1 (<12hrs).
6063	(Ryan et al., 2014)	E-TABM-1224	15	CD29+, CD44+, CD73+, CD90+, CD105+;	0	Fetal (8-12 weeks) chorionic membrane MSC, chorionic villi MSC, bone marrow MSC	Illumina HumanHT-12 V4
				CD14-, CD34-, CD45-,CD31-.
				Adipogenic and Osteogenic differentiation.
				Immunorepression (T-cell proliferation assay)
6416	(Papadimitropoulos et al., 2014)	GSE52896	10	CD29+, CD44+, CD49a+, CD73+, CD90+, CD105+, CD166+, CD31-, CD34-, CD45-, CD117-, CD133-, CD144-, CD271-, ALP-	0	Adult Bone marrow MSC in 2D or 3D culture, P0 (not passaged).	Affymetrix HG-U133_Plus_2
				Chondrogenic (spherical pellet assay), adipogenic, and osteogenic differentiation
6110	(Gotherstrom et al., 2010)	GSE18934	9	CD29+, CD44+, CD106+, CD73+, CD105+, CD49b/d/e+, CD14-, CD34-, CD45-, CD31-, vWF-, Adipogenic, chondrogenic and osteogenic differentiation	3	Fetal (9-14 weeks) blood MSC, fetal bone marrow MSC, fetal liver MSC; maternal lymphocytes	Affymetrix HG-U133_Plus_2
6393	(Martins et al., 2014)	GSE51869	9	CD44+, CD105+, CD90+, CD73+; CD45-, CD34-, CD14-, CD19-, HLA-DR-;	0	Umbilical cord tissue MSC comparing cultures with FBS vs substitutes Human Serum or platelet lysate.	Affymetrix HG-U133_Plus_2
				Adipogenic, chondrogenic and osteogenic differentiation. Immunosupression via T cell proliferation assay and Treg conversion assay.
6064	(Matigian et al., 2015)	E-TABM-880	8	CD29+, CD44+, CD73+, CD90+, CD105+; CD49d+, CD49e+, CD166+, CD146+; Stro1-, CD31-, CD34-, CD45- Adipogenic and osteogenic differentiation.	0	Bone marrow MSC, term cord blood MSC, term placental MSC	Illumina HumanRef-8 V2
6203	(Espagnolle et al., 2014)	GSE48540	8	CD90+, CD73+, CD44+, CD105+, CD45- CD13+, CD166+, CD106+, CD49d+, CD49f+, CD146+; Osteogenic and adipogenic differentiation; in vitro hematopoiesis assay supporting CD34+ to CFU-Gs, CFU-Ms, CFU-GMs and BFU-E	0	Adult Bone marrow MSC (CD146+ pool and CD146low MSC used in training set).	Affymetrix HuGene-1_0-ST V1
6201	(Bozyk et al., 2011)	GSE24583	6	CD73+, CD90+, CD105+, Stro-1+; CD34+, CD31-, CD45-. Adipogenic, osteogenic and chrondrogenic differentiation	3	Umbilical cord blood MSC, neonate lung MSC, fetal fibroblast	Illumina HumanRef-8 V3
6280	(Lee et al., 2009)	GSE13975	6	CD105+, CD73+, CD29+, CD44+, CD106+, CD90+, HLA-I+; CD14-, CD34-, CD45-, CD31-, vWF-, HLA-II-	0	Fetal bone marrow MSC in presence or absence of 600-nm iron oxide (M600) particles	Affymetrix HG-U133_Plus_2
				Adipogenic, chondrogenic and osteogenic differentiation. Cells transplanted intracerebrally into rat preferentially recruited to rat photothrombotic stroke injury compared to mock-stroke control
6293	(Hou et al., 2014)	GSE42632	6	CD105+, CD29+, CD44+, CD73+, CD90+; CD45-, CD34-HLA-DR- ; Osteoblast and adipocyte differentiation.	0	Adult Dermal MSC from healthy skin.	Agilent 026652 4x44K v2
6370	(Markov et al., 2007)	GSE6029	6	CD29+, CD44+, CD73+, CD90+, CD105+, CD11b-, CD34-, CD45-, CD31- ; CFU-F formation; Chondrogenic (spherical pellet assay), adipogenic, and osteogenic differentiation	0	Umbilical cord blood MSC	Affymetrix HG-U133 Set (A+B)
6207	(Gottschling et al., 2013)	GSE23066	5	CD14−, CD19−, CD34−, CD45−, CD73+, CD90+, CD105+, HLA-DR−; Adipogenic and osteogenic differentiation	0	Adult Lung MSC	Affymetrix HG-U133_Plus_2
6206	(Dani et al., 2012)	GSE28205	4	CD45, CD14, CD90, CD29, CD44, CD105, CD166, CD106, CD73 (data not shown).	0	Adult Bone marrow MSC	Illumina HumanRef-8 V3
				Adipogenic and chondrogenic differentiation
6101	(Jansen et al., 2010)	GSE18698	3	HLA-I+, CD73+, CD105+, CD90+; HLA-DR-, CD31-, CD45-, CD80-; Chondrogenic and osteogenic differentiation	0	Umbilical cord blood MSC	Affymetrix HuEx-1_0-ST V2
6199	(Shao et al., 2013)	GSE37065	3	CD14−, CD29+, CD31−, CD34−, CD45−; CD73+, CD90+, CD105+	0	Adult Early passage Bone marrow MSC (p3-p5)	Affymetrix HuGene-1_0-ST V1
				Early passage Osteogenic, adipogenic, and chondrogenic differentiation
6334	(Ullah et al., 2014)	GSE36923	3	CD44+, CD73+, CD90+, CD105+, CD166+; CD45-, CD14-, CD34-; Chondrogenic (spherical pellet assay), adipogenic, and osteogenic differentiation	0	Adult Bone marrow MSC	Affymetrix HG-U133_Plus_2
3000	(Lim et al., 2009)	GSE16997	0		12	Mammary epithelial subsets: CD49f -EpCAM-; CD49f hiEpCAM-; CD49f +EpCAM+; CD49f –EpCAM+	Illumina HumanWG-6 V3
				-
5002	(Bock et al., 2011)	GSE25970	0		43	hESC, iPSC grown on MEF; dermal fibroblasts	Affymetrix HT-HG-U133A
				-
5003	(Novershtern et al., 2011)	GSE24759	0		31	Haematopoietic atlas	Affymetrix HT-HG-U133A
				-
5013	(Yu et al., 2009)	GSE15148	0		28	hESC, iPSC and parental foreskin fibroblasts	Affymetrix HG-U133_Plus_2
				-
5018	(Jia et al., 2010)	GSE20033	0		9	hESC, iPSC and parental foreskin fibroblasts	Affymetrix HG-U133_Plus_2
				-
5023	(Chung et al., 2012)	GSE21655	0		21	hESC, iPSC grown on hFF; fetal fibroblasts.	Affymetrix HuGene-1_0-ST V1
				-
5024	(Jones et al., 2010)	GSE15400	0		9	Germ cells, fetal lung fibroblasts.	Affymetrix HG-U133_Plus_2
				-
5025	(Guenther et al., 2010)	GSE23402	0		39	hESC, iPSC grown on MEF; dermal fibroblasts	Affymetrix HG-U133_Plus_2
				-
5027	(Maherali et al., 2008)	GSE12390	0		21	hESC, iPSC, dermal fibroblast, keratinocyte	Affymetrix HG-U133_Plus_2
				-
5028	(Marchetto et al., 2009)	GSE18618	0		15	Neural progenitor, iPSC, hESC	Affymetrix HG-U133_Plus_2
				-
5033	(Ebert et al., 2009)	GSE13828	0		7	hESC, iPSC, dermal fibroblast	Affymetrix HG-U133_Plus_2
				-
5036	(Nayler et al., 2012)	GSE35347	0		21	hESC, iPSC, dermal fibroblast	Illumina HumanHT-12 V4
				-
5038	(Marchetto et al., 2010)	GSE21037	0		12	hESC, iPSC, dermal fibroblast	Affymetrix HuGene-1_0-ST V1
				-
5041	(Hu et al., 2011)	GSE26672	0		18	Bone marrow and cord blood mononuclear cells	Affymetrix HG-U133_Plus_2
				-
6003	(Karlsson et al., 2008)	GSE15791	0		9	Monocytes, macrophages	Affymetrix HuGene-1_0-ST V1
				-
6006	(Si-Tayeb et al., 2010)	GSE14897	0		15	hESC, iPSC, foreskin fibroblast, hepatocyte	Affymetrix HG-U133_Plus_2
				-
6072	(Vitale et al., 2012)	E-MTAB-1040	0	-	16	Dermal fibroblast	Illumina HumanHT-12 V4
6092	(Andrade et al., 2012)	GSE36648	0	-	12	Dermal fibroblast	Affymetrix HuGene-1_0-ST V1
6114	(Kubo et al., 2009)	GSE9451	0		12	Adipocyte, chondrocyte, osteoblast, gingival fibroblast	Affymetrix HG-U133_Plus_2
				-
6123	(Menge et al., 2012)	GSE40613	0	-	4	Pulmonary endothelial cells	Affymetrix HG-U133_Plus_2
6145	(Ohi et al., 2011)	GSE23034	0	-	24	Hepatocyte, dermal fibroblast, melanocyte	Affymetrix HuGene-1_0-ST V1
6213	(Beliakova-Bethell et al., 2014)	GSE50008	0	-	50	Leukocytes (CD4 and CD8+ T-cells, B-cells, CD14+ monocytes	Illumina HumanHT-12 V4
6242	(Loh et al., 2010)	GSE22167	0	-	14	G-CSF mobilised CD34+ blood progenitor; dermal fibroblast; iPSC; hESC.	Affymetrix HG-U133_Plus_2
6339	(Doulatov et al., 2013)	GSE49938	0	-	28	Cord blood 34+38-90+ HSC; Fetal liver 34+38-90+ HSC; hESC-derived HSC; hESC-derived myeloid progenitor; iPSC-derived HSC; iPSC-derived myeloid progenitor;	Affymetrix HG-U133_Plus_2
6358	(Rapin et al., 2014)	GSE42519	0	-	34	HSC, CMP, MMP myeloid atlas.	Affymetrix HG-U133_Plus_2
